# Supplementary material
Source: PubMed Central journal article supplement (PMC3047447)
Supplement: NIHMS273543-supplement-appendix.pdf [file NIHMS273543-supplement-appendix.pdf]

## Supplementary Appendix

This appendix has been provided by the authors to give readers additional information about their work.

Supplement to: Zhang Y, Baicker K, Newhouse JP. Geographic variation in the quality of prescribing. *N Engl J Med* 2010;363:1985-8. DOI: 10.1056/NEJMp1010220.

## Supplementary Appendix

Appendix Table 1. High Risk Medications for the Elderly and Harmful Drugs

### A. High Risk Medications for the Elderly

| Description                                              | Prescription                                                                                                                                                                                                                                                                                                                                                                                                                                                                                                                                                                                |                                                                                                                                                                                                                                                                                                                                                                                                                                                                                                                                           |                                                                                            |
|----------------------------------------------------------|---------------------------------------------------------------------------------------------------------------------------------------------------------------------------------------------------------------------------------------------------------------------------------------------------------------------------------------------------------------------------------------------------------------------------------------------------------------------------------------------------------------------------------------------------------------------------------------------|-------------------------------------------------------------------------------------------------------------------------------------------------------------------------------------------------------------------------------------------------------------------------------------------------------------------------------------------------------------------------------------------------------------------------------------------------------------------------------------------------------------------------------------------|--------------------------------------------------------------------------------------------|
| Antianxiety (includes combination drugs)                 | • aspirin-meprobamate                                                                                                                                                                                                                                                                                                                                                                                                                                                                                                                                                                       | • meprobamate                                                                                                                                                                                                                                                                                                                                                                                                                                                                                                                             |                                                                                            |
| Antiemetics                                              | • scopolamine                                                                                                                                                                                                                                                                                                                                                                                                                                                                                                                                                                               | • trimethobenzamide                                                                                                                                                                                                                                                                                                                                                                                                                                                                                                                       |                                                                                            |
| Analgesics (includes combination drugs)                  | • ketorolac                                                                                                                                                                                                                                                                                                                                                                                                                                                                                                                                                                                 |                                                                                                                                                                                                                                                                                                                                                                                                                                                                                                                                           |                                                                                            |
| Antihistamines (includes combination drugs)              | <ul style="list-style-type: none"> <li>• APAP/dextromethorphan/diphenhydramine</li> <li>• APAP/diphenhydramine/phenylephrine</li> <li>• APAP/diphenhydramine/pseudoephedrine</li> <li>• acetaminophen-diphenhydramine</li> <li>• carbetapentane/diphenhydramine/phenylephrine</li> <li>• codeine/phenylephrine/promethazine</li> <li>• codeine-promethazine</li> <li>• cyproheptadine</li> <li>• dexchlorpheniramine</li> <li>• dexchlorpheniramine/dextromethorphan/PSE</li> <li>• dexchlorpheniramine/guaifenesin/PSE</li> <li>• dexchlorpheniramine/hydrocodone/phenylephrine</li> </ul> | <ul style="list-style-type: none"> <li>• dexchlorpheniramine/methscopolamine/PSE</li> <li>• dexchlorpheniramine-pseudoephedrine</li> <li>• dextromethorphan-promethazine</li> <li>• diphenhydramine</li> <li>• diphenhydramine/hydrocodone/phenylephrine</li> <li>• diphenhydramine-magnesium salicylate</li> <li>• diphenhydramine-phenylephrine</li> <li>• diphenhydramine-pseudoephedrine</li> <li>• hydroxyzine hydrochloride</li> <li>• hydroxyzine pamoate</li> <li>• phenylephrine-promethazine</li> <li>• promethazine</li> </ul> |                                                                                            |
| Antipsychotic, typical                                   | • thioridazine                                                                                                                                                                                                                                                                                                                                                                                                                                                                                                                                                                              |                                                                                                                                                                                                                                                                                                                                                                                                                                                                                                                                           |                                                                                            |
| Amphetamines                                             | <ul style="list-style-type: none"> <li>• amphetamine-dextroamphetamine</li> <li>• benzphetamine</li> <li>• dexmethylphenidate</li> </ul>                                                                                                                                                                                                                                                                                                                                                                                                                                                    | <ul style="list-style-type: none"> <li>• dextroamphetamine</li> <li>• diethylpropion</li> <li>• methamphetamine</li> <li>• methylphenidate</li> </ul>                                                                                                                                                                                                                                                                                                                                                                                     | <ul style="list-style-type: none"> <li>• phendimetrazine</li> <li>• phentermine</li> </ul> |
| Barbiturates                                             | <ul style="list-style-type: none"> <li>• butabarbital</li> <li>• mephobarbital</li> <li>• pentobarbital</li> </ul>                                                                                                                                                                                                                                                                                                                                                                                                                                                                          | <ul style="list-style-type: none"> <li>• phenobarbital</li> <li>• secobarbital</li> </ul>                                                                                                                                                                                                                                                                                                                                                                                                                                                 |                                                                                            |
| Long-acting benzodiazepines (includes combination drugs) | <ul style="list-style-type: none"> <li>• amitriptyline-chlordiazepoxide</li> <li>• chlordiazepoxide</li> </ul>                                                                                                                                                                                                                                                                                                                                                                                                                                                                              | <ul style="list-style-type: none"> <li>• chlordiazepoxide-clidinium</li> <li>• diazepam</li> </ul>                                                                                                                                                                                                                                                                                                                                                                                                                                        | <ul style="list-style-type: none"> <li>• flurazepam</li> </ul>                             |
| Calcium channel blockers                                 | • nifedipine—short-acting only                                                                                                                                                                                                                                                                                                                                                                                                                                                                                                                                                              |                                                                                                                                                                                                                                                                                                                                                                                                                                                                                                                                           |                                                                                            |
| Gastrointestinal anti-spasmodics                         | • dicyclomine                                                                                                                                                                                                                                                                                                                                                                                                                                                                                                                                                                               | • propantheline                                                                                                                                                                                                                                                                                                                                                                                                                                                                                                                           |                                                                                            |
| Belladonna alkaloids (includes combination drugs)        | <ul style="list-style-type: none"> <li>• atropine</li> <li>• atropine/CPM/hyoscyamine/PE/scopolamine</li> <li>• atropine/hyoscyamine/PB/scopolamine</li> <li>• atropine-difenoxin</li> <li>• atropine-diphenoxylate</li> <li>• atropine-edrophonium</li> <li>• belladonna</li> <li>• belladonna/ergotamine/phenobarbital</li> </ul>                                                                                                                                                                                                                                                         | <ul style="list-style-type: none"> <li>• butabarbital/hyoscyamine/phenazopyridine</li> <li>• digestive enzymes/hyoscyamine/phenyltoloxamine</li> <li>• hyoscyamine</li> <li>• hyoscyamine/methenam/m-blue/phenyl salicyl</li> </ul>                                                                                                                                                                                                                                                                                                       |                                                                                            |
| Skeletal muscle relaxants (includes combination drugs)   | <ul style="list-style-type: none"> <li>• ASA/caffeine/orphenadrine</li> <li>• ASA/carisoprodol/codeine</li> <li>• aspirin-carisoprodol</li> <li>• aspirin-methocarbamol</li> </ul>                                                                                                                                                                                                                                                                                                                                                                                                          | <ul style="list-style-type: none"> <li>• carisoprodol</li> <li>• chlorzoxazone</li> <li>• cyclobenzaprine</li> <li>• metaxalone</li> </ul>                                                                                                                                                                                                                                                                                                                                                                                                | <ul style="list-style-type: none"> <li>• methocarbamol</li> <li>• orphenadrine</li> </ul>  |

|                                             |                                                                                                                            |                                                                                                                           |                                                                 |
|---------------------------------------------|----------------------------------------------------------------------------------------------------------------------------|---------------------------------------------------------------------------------------------------------------------------|-----------------------------------------------------------------|
| Oral estrogens (includes combination drugs) | <ul style="list-style-type: none"> <li>• conjugated estrogen</li> <li>• conjugated estrogen-medroxyprogesterone</li> </ul> | <ul style="list-style-type: none"> <li>• esterified estrogen</li> <li>• esterified estrogen-methyltestosterone</li> </ul> | <ul style="list-style-type: none"> <li>• estropipate</li> </ul> |
|---------------------------------------------|----------------------------------------------------------------------------------------------------------------------------|---------------------------------------------------------------------------------------------------------------------------|-----------------------------------------------------------------|

## B. Harmful Drugs for Older Adults with Dementia

### Tricyclic Antidepressants

| Description                    | Prescription                                                                                                                                                                                                                                             |
|--------------------------------|----------------------------------------------------------------------------------------------------------------------------------------------------------------------------------------------------------------------------------------------------------|
| Psychotherapeutic combinations | <ul style="list-style-type: none"> <li>• amitriptyline-chlordiazepoxide</li> <li>• amitriptyline-perphenazine</li> </ul>                                                                                                                                 |
| Tricyclic antidepressants      | <ul style="list-style-type: none"> <li>• amitriptyline</li> <li>• amoxapine</li> <li>• clomipramine</li> <li>• desipramine</li> <li>• doxepin</li> <li>• imipramine</li> <li>• nortriptyline</li> <li>• protriptyline</li> <li>• trimipramine</li> </ul> |

### Anticholinergic Agents

| Description                           | Prescription                                                                                                                                                                                                                                                                                                                                                                                                                                                                                                                                                                                                                                                                                                                                                                                                                                                                                                                                                                                                                                                                                                                                                                                                                                                                                                                                                                                                                                                                                                                                                                                                                                                                                                                                                                                                                                                                                                                                                                                                                                                                                                                                                                                                                                                                                                                                                                                                                                                                                                                                                                                                                                                                                                                                                                                                                                                             |
|---------------------------------------|--------------------------------------------------------------------------------------------------------------------------------------------------------------------------------------------------------------------------------------------------------------------------------------------------------------------------------------------------------------------------------------------------------------------------------------------------------------------------------------------------------------------------------------------------------------------------------------------------------------------------------------------------------------------------------------------------------------------------------------------------------------------------------------------------------------------------------------------------------------------------------------------------------------------------------------------------------------------------------------------------------------------------------------------------------------------------------------------------------------------------------------------------------------------------------------------------------------------------------------------------------------------------------------------------------------------------------------------------------------------------------------------------------------------------------------------------------------------------------------------------------------------------------------------------------------------------------------------------------------------------------------------------------------------------------------------------------------------------------------------------------------------------------------------------------------------------------------------------------------------------------------------------------------------------------------------------------------------------------------------------------------------------------------------------------------------------------------------------------------------------------------------------------------------------------------------------------------------------------------------------------------------------------------------------------------------------------------------------------------------------------------------------------------------------------------------------------------------------------------------------------------------------------------------------------------------------------------------------------------------------------------------------------------------------------------------------------------------------------------------------------------------------------------------------------------------------------------------------------------------------|
| Anticholinergic antiemetics           | <ul style="list-style-type: none"> <li>• cyclizine</li> <li>• dimenhydrinate</li> <li>• meclizine</li> <li>• scopolamine</li> <li>• trimethobenzamide</li> </ul>                                                                                                                                                                                                                                                                                                                                                                                                                                                                                                                                                                                                                                                                                                                                                                                                                                                                                                                                                                                                                                                                                                                                                                                                                                                                                                                                                                                                                                                                                                                                                                                                                                                                                                                                                                                                                                                                                                                                                                                                                                                                                                                                                                                                                                                                                                                                                                                                                                                                                                                                                                                                                                                                                                         |
| Anticholinergic anti-Parkinson agents | <ul style="list-style-type: none"> <li>• benzotropine</li> <li>• trihexyphenidyl</li> </ul>                                                                                                                                                                                                                                                                                                                                                                                                                                                                                                                                                                                                                                                                                                                                                                                                                                                                                                                                                                                                                                                                                                                                                                                                                                                                                                                                                                                                                                                                                                                                                                                                                                                                                                                                                                                                                                                                                                                                                                                                                                                                                                                                                                                                                                                                                                                                                                                                                                                                                                                                                                                                                                                                                                                                                                              |
| Anticholinergics/antispasmodics       | <ul style="list-style-type: none"> <li>• belladonna</li> <li>• dicyclomine</li> <li>• hyoscyamine</li> <li>• propantheline</li> </ul>                                                                                                                                                                                                                                                                                                                                                                                                                                                                                                                                                                                                                                                                                                                                                                                                                                                                                                                                                                                                                                                                                                                                                                                                                                                                                                                                                                                                                                                                                                                                                                                                                                                                                                                                                                                                                                                                                                                                                                                                                                                                                                                                                                                                                                                                                                                                                                                                                                                                                                                                                                                                                                                                                                                                    |
| Antihistamines                        | <ul style="list-style-type: none"> <li>• azatadine</li> <li>• brompheniramine</li> <li>• chlorpheniramine</li> <li>• clemastine</li> <li>• cyproheptadine</li> <li>• dexchlorpheniramine</li> <li>• diphenhydramine</li> <li>• hydroxyzine hydrochloride</li> <li>• hydroxyzine pamoate</li> <li>• triprolidine</li> </ul>                                                                                                                                                                                                                                                                                                                                                                                                                                                                                                                                                                                                                                                                                                                                                                                                                                                                                                                                                                                                                                                                                                                                                                                                                                                                                                                                                                                                                                                                                                                                                                                                                                                                                                                                                                                                                                                                                                                                                                                                                                                                                                                                                                                                                                                                                                                                                                                                                                                                                                                                               |
| Phenothiazine antiemetics             | <ul style="list-style-type: none"> <li>• prochlorperazine</li> <li>• promethazine</li> </ul>                                                                                                                                                                                                                                                                                                                                                                                                                                                                                                                                                                                                                                                                                                                                                                                                                                                                                                                                                                                                                                                                                                                                                                                                                                                                                                                                                                                                                                                                                                                                                                                                                                                                                                                                                                                                                                                                                                                                                                                                                                                                                                                                                                                                                                                                                                                                                                                                                                                                                                                                                                                                                                                                                                                                                                             |
| Skeletal muscle relaxants             | <ul style="list-style-type: none"> <li>• carisoprodol</li> <li>• chlorzoxazone</li> <li>• cyclobenzaprine</li> <li>• metaxalone</li> <li>• methocarbamo</li> <li>• orphenadrine</li> </ul>                                                                                                                                                                                                                                                                                                                                                                                                                                                                                                                                                                                                                                                                                                                                                                                                                                                                                                                                                                                                                                                                                                                                                                                                                                                                                                                                                                                                                                                                                                                                                                                                                                                                                                                                                                                                                                                                                                                                                                                                                                                                                                                                                                                                                                                                                                                                                                                                                                                                                                                                                                                                                                                                               |
| Upper respiratory combinations        | <ul style="list-style-type: none"> <li>• APAP/diphenhydramine/pseudoephedrine</li> <li>• atropine/CPM/hyoscyamine/PSE/scopolamine</li> <li>• brompheniramine/carbetapentane/phenylephrine</li> <li>• brompheniramine/dextromethorphan/phenylephrine</li> <li>• brompheniramine/dextromethorphan/PSE</li> <li>• brompheniramine/DM/guaifenesin/phenylephrine</li> <li>• brompheniramine/DM/guaifenesin/PSE</li> <li>• brompheniramine/DM/phenylephrine</li> <li>• brompheniramine/hydrocodone/phenylephrine</li> <li>• brompheniramine/hydrocodone/pseudoephedrine</li> <li>• brompheniramine-phenylephrine</li> <li>• brompheniramine-pseudoephedrine</li> <li>• carbetapentane/chlorpheniramine/phenylephrine</li> <li>• carbetapentane/CPM/ephedrine/phenylephrine</li> <li>• carbetapentane/diphenhydramine/phenylephrine</li> <li>• carbetapentane-chlorpheniramine</li> <li>• carbetapentane-diphenhydramine</li> <li>• chlorpheniramine-phenylephrine</li> <li>• chlorpheniramine-pseudoephedrine</li> <li>• chlorpheniramine/codeine/PE/K iodide</li> <li>• chlorpheniramine/codeine/pseudoephedrine</li> <li>• chlorpheniramine/dextromethorphan/phenylephrine</li> <li>• chlorpheniramine/dextromethorphan/PSE</li> <li>• chlorpheniramine/dihydrocodeine/phenylephrine</li> <li>• chlorpheniramine/dihydrocodeine/PSE</li> <li>• chlorpheniramine/DM/guaifenesin/phenylephrine</li> <li>• chlorpheniramine/DM/methscopolamine</li> <li>• chlorpheniramine/DM/phenylephrine</li> <li>• chlorpheniramine/guaifenesin/phenylephrine</li> <li>• chlorpheniramine/hydrocodone/phenylephrine</li> <li>• chlorpheniramine/hydrocodone/PSE</li> <li>• chlorpheniramine/methscopolamine/PE</li> <li>• chlorpheniramine/methscopolamine/PSE</li> <li>• chlorpheniramine/PE/phenyltoloxamine</li> <li>• chlorpheniramine/phenylephrine/pyrilamine</li> <li>• chlorpheniramine-hydrocodone</li> <li>• chlorpheniramine-methscopolamine</li> <li>• chlorpheniramine-phenylephrine</li> <li>• chlorpheniramine-pseudoephedrine</li> <li>• codeine/phenylephrine/promethazine</li> <li>• codeine/pseudoephedrine/triprolidine</li> <li>• codeine-promethazine</li> <li>• dexchlorpheniramine/dextrometho/PE/pyrilamine</li> <li>• dexchlorpheniramine/dextromethorphan/PE</li> <li>• dexchlorpheniramine/dextromethorphan/PSE</li> <li>• dexchlorpheniramine/hydrocodone/phenylephrine</li> <li>• dexchlorpheniramine/methscopolamine/PE</li> <li>• dexchlorpheniramine/methscopolamine/PSE</li> <li>• dexchlorpheniramine-pseudoephedrine</li> <li>• dextromethorphan/diphenhydramine/PE</li> <li>• dextromethorphan-promethazine</li> <li>• diphenhydramine/hydrocodone/phenylephrine</li> <li>• diphenhydramine-phenylephrine</li> <li>• hydrocodone/pseudoephedrine/triprolidine</li> <li>• phenylephrine-promethazine</li> <li>• pseudoephedrine-triprolidine</li> </ul> |
| Urinary antispasmodics                | <ul style="list-style-type: none"> <li>• butabarbital/hyoscyamine/phenazopyridine</li> <li>• flavoxate</li> <li>• hyoscyamine/methenam/m-blue/phenyl salicyl</li> <li>• oxybutynin</li> <li>• tolterodine</li> </ul>                                                                                                                                                                                                                                                                                                                                                                                                                                                                                                                                                                                                                                                                                                                                                                                                                                                                                                                                                                                                                                                                                                                                                                                                                                                                                                                                                                                                                                                                                                                                                                                                                                                                                                                                                                                                                                                                                                                                                                                                                                                                                                                                                                                                                                                                                                                                                                                                                                                                                                                                                                                                                                                     |

## C. Harmful Drugs for Older Adults with a History of Hip Fractures

**Table DDE-C: Tricyclic Antidepressants**

| Description                    | Prescription                                                                                                                                                                                                                                             |
|--------------------------------|----------------------------------------------------------------------------------------------------------------------------------------------------------------------------------------------------------------------------------------------------------|
| Psychotherapeutic combinations | <ul style="list-style-type: none"> <li>• amitriptyline-chlordiazepoxide</li> <li>• amitriptyline-perphenazine</li> </ul>                                                                                                                                 |
| Tricyclic antidepressants      | <ul style="list-style-type: none"> <li>• amitriptyline</li> <li>• amoxapine</li> <li>• clomipramine</li> <li>• desipramine</li> <li>• doxepin</li> <li>• imipramine</li> <li>• nortriptyline</li> <li>• protriptyline</li> <li>• trimipramine</li> </ul> |

**Table DDE-D: Antipsychotics and Sleep Agents**

| Description                                        | Prescription                                                                                                                                                                                                                                                                                |
|----------------------------------------------------|---------------------------------------------------------------------------------------------------------------------------------------------------------------------------------------------------------------------------------------------------------------------------------------------|
| Miscellaneous antipsychotic agents                 | <ul style="list-style-type: none"> <li>• aripiprazole</li> <li>• clozapine</li> <li>• haloperidol</li> <li>• loxapine</li> <li>• molindone</li> <li>• olanzapine</li> <li>• paliperidone</li> <li>• pimozide</li> <li>• quetiapine</li> <li>• risperidone</li> <li>• ziprasidone</li> </ul> |
| Miscellaneous anxiolytics, sedatives and hypnotics | <ul style="list-style-type: none"> <li>• eszopiclone</li> <li>• ramelteon</li> <li>• zaleplon</li> <li>• zolpidem</li> </ul>                                                                                                                                                                |
| Phenothiazine antipsychotics                       | <ul style="list-style-type: none"> <li>• prochlorperazine</li> <li>• chlorpromazine</li> <li>• fluphenazine</li> <li>• mesoridazine</li> <li>• perphenazine</li> <li>• thioridazine</li> <li>• trifluoperazine</li> </ul>                                                                   |
| Psychotherapeutic combinations                     | <ul style="list-style-type: none"> <li>• fluoxetine-olanzapine</li> </ul>                                                                                                                                                                                                                   |
| Thioxanthenes                                      | <ul style="list-style-type: none"> <li>• thiothixene</li> </ul>                                                                                                                                                                                                                             |

**Table DDE-F: Medications for Dementia**

| Description                                 | Prescription                                                                                                                    |
|---------------------------------------------|---------------------------------------------------------------------------------------------------------------------------------|
| Cholinesterase inhibitors                   | <ul style="list-style-type: none"> <li>• donepezil</li> <li>• galantamine</li> <li>• rivastigmine</li> <li>• tacrine</li> </ul> |
| Miscellaneous central nervous system agents | <ul style="list-style-type: none"> <li>• memantine</li> </ul>                                                                   |

### Long-acting benzodiazepines

| Description                                              | Prescription                                                                                                                                                                                   |
|----------------------------------------------------------|------------------------------------------------------------------------------------------------------------------------------------------------------------------------------------------------|
| Long-acting benzodiazepines (includes combination drugs) | <ul style="list-style-type: none"> <li>• amitriptyline-chlordiazepoxide</li> <li>• chlordiazepoxide</li> <li>• chlordiazepoxide-clidinium</li> <li>• diazepam</li> <li>• flurazepam</li> </ul> |

## D. Harmful Drugs for Older Adults with Chronic Renal Failure

**HEDIS Table DDE-I: NSAIDs and Cox-2 Selective NSAIDs**

| Description                           | Prescription                                                                                                                                                                                                                                                                                                                                                                                                                                                                                   |
|---------------------------------------|------------------------------------------------------------------------------------------------------------------------------------------------------------------------------------------------------------------------------------------------------------------------------------------------------------------------------------------------------------------------------------------------------------------------------------------------------------------------------------------------|
| Cox-2 inhibitors                      | <ul style="list-style-type: none"> <li>• celecoxib</li> </ul>                                                                                                                                                                                                                                                                                                                                                                                                                                  |
| Nonsteroidal anti-inflammatory agents | <ul style="list-style-type: none"> <li>• diclofenac potassium</li> <li>• diclofenac sodium</li> <li>• etodolac</li> <li>• fenoprofen</li> <li>• flurbiprofen</li> <li>• ibuprofen</li> <li>• indomethacin</li> <li>• ketoprofen</li> <li>• ketorolac</li> <li>• meclufenamate</li> <li>• mefenamic acid</li> <li>• meloxicam</li> <li>• nabumetone</li> <li>• naproxen</li> <li>• naproxen sodium</li> <li>• oxaprozin</li> <li>• piroxicam</li> <li>• sulindac</li> <li>• tolmetin</li> </ul> |

Appendix Table 2. Correlation among HEDIS Quality Measures

|                                                                                          | Proportion of Elderly Beneficiaries Using High Risk Drugs | Proportion of Elderly Beneficiaries with Dementia Using Harmful Drugs | Proportion of Elderly Beneficiaries with Hip/Pelvic Fractures Using Harmful Drugs * | Proportion of Elderly Beneficiaries with Chronic Renal Disease Using Harmful Drugs | Proportion of Elderly Beneficiaries with At Least one of the Disease Using Harmful Drugs |
|------------------------------------------------------------------------------------------|-----------------------------------------------------------|-----------------------------------------------------------------------|-------------------------------------------------------------------------------------|------------------------------------------------------------------------------------|------------------------------------------------------------------------------------------|
| Proportion of Elderly Beneficiaries Using High Risk Drugs                                | 1                                                         | 0.75 (p<.001)                                                         | 0.23 (p<.001)                                                                       | 0.48 (p<.001)                                                                      | 0.75 (p<.001)                                                                            |
| Proportion of Elderly Beneficiaries with Dementia Using Harmful Drugs                    |                                                           | 1                                                                     | 0.20 (p=0.002)                                                                      | 0.45 (p<.001)                                                                      | 0.87 (p<.001)                                                                            |
| Proportion of Elderly Beneficiaries with Hip/Pelvic Fractures Using Harmful Drugs *      |                                                           |                                                                       | 1                                                                                   | 0.15 (p=0.02)                                                                      | 0.38 (p<.001)                                                                            |
| Proportion of Elderly Beneficiaries with Chronic Renal Disease Using Harmful Drugs       |                                                           |                                                                       |                                                                                     | 1                                                                                  | 0.74 (p<.001)                                                                            |
| Proportion of Elderly Beneficiaries with At Least one of the Disease Using Harmful Drugs |                                                           |                                                                       |                                                                                     |                                                                                    | 1                                                                                        |

Note: \* For all the correlations using “proportion of elderly beneficiaries with hip/pelvic fractures using harmful drugs”, only 256 HRRs were used because only 256 HRRs had more than 25 beneficiaries with a history of hip/pelvic fractures. For all the other correlations, 306 HRRs were used.

Appendix Table 3. Correlation between HEDIS Quality Measures and Spending.\*

| HEDIS Quality Measure                                                                                     | Adjusted Annual<br>Gross Drug<br>Spending per<br>Beneficiary | Adjusted Annual<br>Gross Non-Drug<br>Medical<br>Spending |
|-----------------------------------------------------------------------------------------------------------|--------------------------------------------------------------|----------------------------------------------------------|
|                                                                                                           | correlation coefficient (P value)                            |                                                          |
| Proportion of elderly beneficiaries using high-risk drugs                                                 | 0.06 (0.34)                                                  | 0.30 (<0.001)                                            |
| Proportion of elderly beneficiaries with dementia using potentially harmful drugs                         | 0.07 (=0.20)                                                 | 0.24 (<0.001)                                            |
| Proportion of elderly beneficiaries with hip or pelvic fractures using potentially harmful drugs          | 0.22 ( $\leq$ 0.001)                                         | -0.04 (0.50)                                             |
| Proportion of elderly beneficiaries with chronic renal disease using potentially harmful drugs            | 0.00 (0.94)                                                  | 0.19 (<0.001)                                            |
| Proportion of elderly beneficiaries with at least one of these conditions using potentially harmful drugs | 0.12 (0.04)                                                  | 0.25 (<0.001)                                            |

\*Analyses involving the proportion of elderly beneficiaries with hip or pelvic fractures using potentially harmful drugs included only the 256 HRRs with more than 25 beneficiaries who had a history of hip or pelvic fractures. For all the other correlations, all 306 HRRs were used. Less than 1% of total drug spending was devoted to high-risk drugs, and less than 1% was devoted to drugs with potentially harmful interactions with a patient's underlying disease. Correlations to total drug spending are shown here. Correlations to spending on non-high risk and non-harmful drugs are described in text. Correlations are adjusted for age, gender, health status (CMS-HCC or Rx-HCC scores), and in the case of non-drug medical spending, medical price levels.
